# Supplementary material for: Development of rat female genital cortex and control of female puberty by sexual touch
Source: PLoS Biol. 2017 Sep 21;15(9):e2001283. doi: 10.1371/journal.pbio.2001283 (PMC5608169; doi:10.1371/journal.pbio.2001283)
Supplement: S1 Data — Individual data for Figs 1, 2, 3, 4, 5 and 6 and S2 and S5 Figs. (XLSX) [file pbio.2001283.s007.xlsx]

## Sheet: Fig 1 E-G
Untreated																		Ovarectomies
ADULT	clitoris (% of S1)	clitoris (% of PMBSF)	clitoris area	S1 area (mm2)	PMBSF (mm2)			YOUNG	clitoris (% of S1)	clitoris (% of PMBSF)	clitoris area	S1 area (mm2)	PMBSF (mm2)					ADULT		clitoris (%)		S1 area (mm2)		YOUNG			clitoris (%)		S1 area (mm2)
A	1.73021	7.63482	0.766841	44.3207	10.044			A	1.1508	4.7641	0.318766	27.6995	6.691					CL030216RH		1.55638	0.647785	41.6212		CL150216 ovarecP20 RH C			0.856584	0.269257	31.4338
B	1.65499	8.94997	0.61345	37.0667	6.85421			B	0.893452	4.44789	0.288174	32.254	6.47889					CL030216 LH		1.88802	0.763455	40.4367		CL150216 ovarec P20 LH C			1.36735	0.428121	31.3102
C	2.00064	11.1016	0.540652	27.024	4.87003			C	0.927837	4.45339	0.273981	29.529	6.15219					CL110216RH		2.26982	0.955646	42.1023		CL150216 ovarec P20 RH D			1.57288	0.50352	32.0127
D	1.54359	7.25943	0.442811	28.6871	6.0998			D	1.04622	4.16006	0.323938	30.9626	7.78685					ACCL230216 LH		1.16252	0.381738	32.8371		CL150216 ovarec P20 LH D			1.23857	0.410361	33.1319
E	1.60454	7.05302	0.401032	24.9936	5.68596			E	0.770853	2.8521	0.222089	28.8108	7.78685					AC020216LH		1.74327	0.478612	27.4548		CLAC050116 B RH			1.38478	0.437814	31.6161
F	1.71262	9.01449	0.361954	21.1344	4.01524			F	0.786521	4.25192	0.289535	34.638	9.13707					CL120416 RH		1.29892	0.419318	32.282		CLAC050116 B LH			0.860932	0.295911	34.371
G	2.44182	12.8114	0.5527	22.6348	4.31412			G	1.1216	3.79951	0.388501	36.8121	7.62033					CL120416 LH		0.996441	0.422808	42.4318		clca050116 A RH			1.17241	0.400052	34.1221
H	1.59485	6.70073	0.338754	21.2405	5.05548			H	1.20149	5.68878	0.259247	21.5772	4.55716					CL180316 LH		1.92424	0.722294	37.5365		CLCA050116 A LH			0.866954	0.304503	35.1233
I	2.065	8.78427	0.549068	31.0792	6.25058			I	1.29765	6.8152	0.27501	21.193	4.03524											CL250316 E H?			0.851939	0.339168	39.8113
J	1.58346	10.3659	0.642045	34.6752	6.19384			J	1.14684	5.14448	0.272512	23.762	5.29716											CL250316 F RH			0.83156	0.308778	37.1324
K	1.983	9.35367	0.809664	40.8302	8.65611			K	1.40547	6.54403	0.317066	22.5595	4.84512											CL250316 G LH			0.559347	0.187375	33.4989
L	1.942	9.4507	0.813933	41.9077	8.61241																			CL250316 G RH			1.22167	0.442832	36.2482
Ovariectomies
ADULT	clitoris (% of S1)	clitoris (% of PMBSF)	clitoris area	S1 area (mm2)	PMBSF (mm2)			YOUNG	clitoris (% of S1)	clitoris (% of PMBSF)	clitoris area	S1 area (mm2)	PMBSF (mm2)
A	1.55638	7.59692	0.647785	41.6212	8.52694			A	0.856584	3.59175	0.269257	31.4338	7.49655
B	1.88802	9.46727	0.763455	40.4367	8.06415			B	1.36735	6.36341	0.428121	31.3102	6.72785
C	2.26982	10.4882	0.955646	42.1023	9.11167			C	1.57288	7.0016	0.50352	32.0127	7.1915
D	1.16252	5.64903	0.381738	32.8371	6.75759			D	1.23857	6.08727	0.410361	33.1319	6.7413
E	1.74327	6.60293	0.478612	27.4548	7.24848			E	1.38478	6.39849	0.437814	31.6161	6.84246
F	1.29892	5.60574	0.419318	32.282	7.48015			F	0.860932	4.43876	0.295911	34.371	6.66653
G	0.996441	4.3724	0.422808	42.4318	9.66992			G	1.17241	5.27655	0.400052	34.1221	7.5817
H	1.92424	7.69204	0.722294	37.5365	9.39015			H	0.866954	3.41152	0.304503	35.1233	8.92572
								I	0.851939	4.0747	0.339168	39.8113	8.32376
								J	0.83156	3.81722	0.308778	37.1324	8.08908
								K	0.559347	2.66661	0.187375	33.4989	7.0267
								L	1.22167	6.23354	0.442832	36.2482	7.10402

## Sheet: Fig 2 C-E
control Seame oil injected						Exp Estradiol injected
	clitoris (% of S1)	clitoris area	S1 area (mm2)				clitoris (% of S1)	clitoris area	S1 area (mm2)
ctrl 3 A	0.983532	0.348609	35.4446			est3 A	2.22716	0.751982	33.7642	2
ctrl 3 B	0.899999	0.301307	33.4786			est3 B	1.58535	0.529226	33.3822	2
ctrl 2 A	1.23087	0.443858	36.0604			est2 A	1.433	0.523819	36.554	2
ctrl 2 B	1.37596	0.494508	35.9392			est2 B	1.32462	0.412354	31.1301	2
ctrl 1 A	1.03388	0.365075	35.3112			est1 A	1.40683	0.461508	32.8047	2
ctrl 1 B	0.598005	0.200879	33.5915			est1 B	1.61219	0.466675	28.9466	2
ctrl 4 A	0.710155	0.219376	30.1989			est4 A	1.57921	0.453808	28.7364	2
ctrl 4 B	0.929951	0.280835	30.8913			est4 B	1.36097	0.415449	30.5259	2
ctrl 5 A	1.00836	0.345802	34.2936			est5 A	2.0937	0.586577	28.0163	2
ctrl 5 B	0.935006	0.265984	28.4473			est5 B	1.54589	0.493309	31.9109	2
ctrl 6 A	1.31908	0.402098	30.4833			est6 A	1.38441	0.396501	28.6404	2
ctrl 6 B	1.14012	0.348246	30.5448			est6 B	1.29755	0.406729	31.346	2
						est7 A	2.08414	0.616485	29.5798	2

## Sheet: Fig 3 C-E
ADULT						YOUNG
	Interlimb Cortex mm2	genital cortex mm2	fraction	interlimb-genital mm2			Interlimb Cortex mm2	genital cortex mm2	fraction	interlimb-genital mm2
A	1.57741	0.766841	48.6139	0.810569		A	1.13623	0.288174	25.3623	0.848056
B	1.20524	0.61345	50.8986	0.59179		B	0.719693	0.273981	38.0691	0.445712
C	1.26313	0.540652	42.8026	0.722478		C	0.68657	0.323938	47.1821	0.362632
D	1.03204	0.442811	42.9064	0.589229		D	0.963917	0.222089	23.0403	0.741828
E	0.822808	0.401032	48.7394	0.421776		E	1.75184	0.289535	16.5275	1.46231
F	0.688364	0.361954	52.5817	0.32641		F	1.52116	0.388501	25.5398	1.13266
G	1.01344	0.5527	54.537	0.46074		G	0.635392	0.259247	40.8011	0.376145
H	0.569516	0.338754	59.481	0.230762		H	0.698488	0.27501	39.3721	0.423478
I	1.1544	0.549068	47.5631	0.605332		I	0.554684	0.272512	49.1292	0.282172
J	1.03682	0.642045	61.9244	0.394775		J	0.661916	0.317066	47.9012	0.34485
K	1.69206	0.809664	47.8508	0.882396
L	1.53749	0.813933	52.9391	0.723557

## Sheet: Fig 4 C-E
		% Clitoris	clitoris area	S1 area
Female contact	A	1.76804	0.612696	34.654
	B	1.68337	0.510646	30.3348
	C	1.78396	0.523854	29.3646
	D	1.69392	0.453058	26.7461
	E	1.04911	0.36046	34.3587
	F	0.924836	0.312493	33.789
	G	1.65014	0.6235	37.7847
	H	1.52117	0.536853	35.2921
	I	0.966643	0.363449	37.5991
	J	0.587376	0.210623	35.8583
	K	1.07757	0.333163	30.9181
	L	1.59851	0.534792	33.4556
		% Clitoris	clitoris area	S1 area
Male contact	A	2.51764	0.752528	29.8902
	B	1.72565	0.493651	28.6066
	C	2.00343	0.559287	27.9165
	D	1.60336	0.509007	31.7462
	E	1.87217	0.617802	32.9992
	F	1.44445	0.506555	35.0691
	G	1.99584	0.623038	31.2168
	H	2.0824	0.835658	40.1296
	I	1.48135	0.540854	36.5108
		% Clitoris	clitoris area	S1 area
Male No contact	A	1.32024	0.350773	26.5688
	B	1.13926	0.340675	29.9031
	C	2.41105	0.642323	26.6408
	D	1.34708	0.368427	27.35
	E	1.14715	0.401537	35.003
	F	1.32572	0.404348	30.5003
	G	1.88736	0.54281	35.8676
	H	0.867445	0.295266	34.0386
	I	1.51337	0.54281	35.8676
	J	1.047	0.382649	36.5473
	K	0.962263	0.338804	35.2091
	L	0.978143	0.341957	34.9598

## Sheet: Fig 5 E-G and I-J
E-G
TTX					ctrl
	% Clitoris	clitoris area mm2	S1 area mm2				% Clitoris	clitoris area mm2	S1 area mm2
A	0.999176	0.326333	32.6602		A		1.55713	0.551039	35.3881
B	0.738156	0.275214	37.284		B		1.57608	0.582647	36.9681
C	1.17719	0.271319	33.1757		C		1.32963	0.464881	34.9633
D	1.12031	0.289637	25.8533		D		1.32697	0.411938	31.0436
E	1.21663	0.394067	32.3901		E		1.78634	0.554924	31.0649
F	0.90241	0.323996	35.9034		F		1.74666	0.440582	25.2242
G	1.16524	0.370721	31.815		G		1.35582	0.361518	26.6641
H	0.945256	0.347269	36.7381		H		1.53248	0.454235	29.6405
I	1.14196	0.346051	30.3033		I		1.33786	0.483921	36.1713
J	0.833144	0.288902	34.6761		J		1.36469	0.501611	36.7565
K	1.06935	0.348557	32.5953		K		0.941721	0.30655	32.5521
L	0.735975	0.255186	34.6732		L		1.2714	0.391534	30.7954
					M		1.4956	0.499044	33.3675
					N		1.4089	0.446955	31.7236
					O		1.75579	0.559398	31.8602
					P		1.33036	0.456887	34.343
I-J
	vagina score	uterus weigth			vagina score	uterus weigth
I	1	0.045		I	0	0.045
II	0.5	0.061		II	0	0.06
III	0.5	0.07		III	0	0.05
IV	0.5	0.08		IV	0	0.028
V	0.5	0.072		V	0.5	0.055
VI	0.5	0.058		VI	0	0.049
VII	0	0.05		VII	0	0.055
VIII	1	0.07		VIII	0	0.0467
IX	0	0.0457		IX	0	0.045
X	1	0.353		X	1	0.1799
XI	0.5	0.0541		XI	0	0.343
XII	1	0.0783
XIII	1	0.129

## Sheet: Fig 6 E-G and J-K
E-G
Control					Brushed
	% Clitoris	clitoris area mm2	S1 area mm2			% Clitoris	clitoris area mm2	S1 area mm2
A	0.920403	0.315156	34.2411		A	1.4112	0.525437	37.2333
B	1.38381	0.470155	33.9754		B	1.00093	0.354618	35.4288
C	1.24232	0.450988	36.3022		C	1.59684	0.545739	34.1761
D	0.434863	0.135118	31.0714		D	1.43283	0.426064	29.7359
E	1.24307	0.374434	30.1216		E	2.01564	0.542959	26.9373
F	1.33454	0.557647	41.7856		F	1.93936	0.902548	46.5384
G	0.926496	0.334179	36.0691		G	1.81493	0.514328	28.3387
H	1.5185	0.550475	36.2512		H	1.7509	0.710243	40.5645
I	2.25855	0.71509	31.6615		I	1.00956	0.382017	37.84
J	1.28158	0.412125	32.1576		J	1.72887	0.599521	34.6771
K	1.72129	0.483449	28.0864		K	1.33939	0.449068	33.5278
L	1.04722	0.388176	37.0672		L	0.983602	0.315144	32.0398
M	1.12543	0.434581	38.6145		M	1.50911	0.46238	30.6393
N	0.988773	0.415504	42.0222		N	2.11846	0.775364	36.6004
O	1.27306	0.512574	40.2631		O	2.07508	0.976325	47.05
P	0.846752	0.388107	45.8348		P	2.80293	0.890391	31.7664
Q	1.08161	0.539457	49.8756		Q	2.19959	0.84755	38.5322
R	1.10091	0.490181	44.5252		R	1.75133	0.665906	38.0228
S	1.24435	0.519084	41.7152		S	1.2731	0.557162	43.7642
T	1.24378	0.415827	33.4326		T	1.4221	0.556626	39.141
U	1.3356	0.573194	42.9166		U	1.15425	0.422066	36.5661
					V	1.08739	0.50511	46.4515
					W	1.24922	0.481637	38.5551
					X	1.65819	0.678208	40.9004
					Z	1.59963	0.65043	40.6614
					Y	1.53907	0.584469	37.9754
					AA	2.34059	1.07057	45.7393
					BB	1.12082	0.495731	44.2293
J-K
Control					Brushed
	Vagina score	Weight UTERUS				Vagina score	Weight UTERUS
A	0	0.0504			A	1	0.121
B	0	0.0895			B	1	0.219
C	0	0.0681			C	0	0.0578
D	1	0.1179			D	0	0.0394
E	0	0.0514			E	0.5	0.047
F	0	0.0367			F	0.5	0.0577
G	1	0.1			G	0.5	0.109
H	1	0.0736			H	0	0.0722
I	0	0.0871			I	0	0.054
J	0	0.0648			J	1	0.2802
K	1	0.1071			K	1	0.252
L	0	0.0719			L	0	0.1321
M	0	0.1072			M	1	0.3071
N	0	0.0472			N	1	0.1688
O	0	0.132			O	0	0.1292
P	1	0.1			P	0.5	0.109
Q	1	0.0736			Q	0	0.0722
R	0	0.0871			R	0	0.054
S	0	0.0648			S	1	0.2802
T	1	0.1071			T	1	0.252
U	0	0.0719			U	0	0.1321
V	0	0.1072			V	1	0.3071
W	0	0.0472			W	1	0.1688
X	0	0.132			X	0	0.1292

## Sheet: S2
Untreated
ADULT	clitoris (% of S1)	clitoris (% of PMBSF)	clitoris area	S1 area (mm2)	PMBSF (mm2)			YOUNG	clitoris (% of S1)	clitoris (% of PMBSF)	clitoris area	S1 area (mm2)	PMBSF (mm2)
A	1.73021	7.63482	0.766841	44.3207	10.044			A	1.1508	4.7641	0.318766	27.6995	6.691
B	1.65499	8.94997	0.61345	37.0667	6.85421			B	0.893452	4.44789	0.288174	32.254	6.47889
C	2.00064	11.1016	0.540652	27.024	4.87003			C	0.927837	4.45339	0.273981	29.529	6.15219
D	1.54359	7.25943	0.442811	28.6871	6.0998			D	1.04622	4.16006	0.323938	30.9626	7.78685
E	1.60454	7.05302	0.401032	24.9936	5.68596			E	0.770853	2.8521	0.222089	28.8108	7.78685
F	1.71262	9.01449	0.361954	21.1344	4.01524			F	0.786521	4.25192	0.289535	34.638	9.13707
G	2.44182	12.8114	0.5527	22.6348	4.31412			G	1.1216	3.79951	0.388501	36.8121	7.62033
H	1.59485	6.70073	0.338754	21.2405	5.05548			H	1.20149	5.68878	0.259247	21.5772	4.55716
I	2.065	8.78427	0.549068	31.0792	6.25058			I	1.29765	6.8152	0.27501	21.193	4.03524
J	1.58346	10.3659	0.642045	34.6752	6.19384			J	1.14684	5.14448	0.272512	23.762	5.29716
K	1.983	9.35367	0.809664	40.8302	8.65611			K	1.40547	6.54403	0.317066	22.5595	4.84512
L	1.942	9.4507	0.813933	41.9077	8.61241
Ovariectomies
ADULT	clitoris (% of S1)	clitoris (% of PMBSF)	clitoris area	S1 area (mm2)	PMBSF (mm2)			YOUNG	clitoris (% of S1)	clitoris (% of PMBSF)	clitoris area	S1 area (mm2)	PMBSF (mm2)
A	1.55638	7.59692	0.647785	41.6212	8.52694			A	0.856584	3.59175	0.269257	31.4338	7.49655
B	1.88802	9.46727	0.763455	40.4367	8.06415			B	1.36735	6.36341	0.428121	31.3102	6.72785
C	2.26982	10.4882	0.955646	42.1023	9.11167			C	1.57288	7.0016	0.50352	32.0127	7.1915
D	1.16252	5.64903	0.381738	32.8371	6.75759			D	1.23857	6.08727	0.410361	33.1319	6.7413
E	1.74327	6.60293	0.478612	27.4548	7.24848			E	1.38478	6.39849	0.437814	31.6161	6.84246
F	1.29892	5.60574	0.419318	32.282	7.48015			F	0.860932	4.43876	0.295911	34.371	6.66653
G	0.996441	4.3724	0.422808	42.4318	9.66992			G	1.17241	5.27655	0.400052	34.1221	7.5817
H	1.92424	7.69204	0.722294	37.5365	9.39015			H	0.866954	3.41152	0.304503	35.1233	8.92572
								I	0.851939	4.0747	0.339168	39.8113	8.32376
								J	0.83156	3.81722	0.308778	37.1324	8.08908
								K	0.559347	2.66661	0.187375	33.4989	7.0267
								L	1.22167	6.23354	0.442832	36.2482	7.10402

## Sheet: S5
Only include brains where both hemispheres where analysed	uterus	brain
sesame oil	0.437	0.815942
sesame oil	0.168	1.30342
sesame oil	0.103	0.941765
sesame oil	0.113	0.817772
sesame oil	0.102	0.971682
sesame oil	0.085	1.2296
estrogen	0.25	1.40683
estrogen	0.29	1.37881
estrogen	0.58	1.90626
estrogen	0.21	1.5957
estrogen	0.22	1.72734
estrogen	0.26	1.46515
estrogen	0.215	1.69084
ELVAX Ctrl	0.045	1.55124
ELVAX Ctrl	0.061	1.53248
ELVAX Ctrl	0.07	1.56661
ELVAX Ctrl	0.08	1.32963
ELVAX Ctrl	0.072	1.32697
ELVAX Ctrl	0.058	1.78634
ELVAX Ctrl	0.05	1.35127
ELVAX Ctrl	0.0457	1.10656
ELVAX Ctrl	0.353	1.45225
ELVAX Ctrl	0.0541	1.54308
ELVAX Ctrl	0.0783	1.87967
ELVAX Ctrl	0.129	1.64967
TTX	0.045	0.868666
TTX	0.06	1.17719
TTX	0.05	1.21663
TTX	0.028	0.90241
TTX	0.055	1.05525
TTX	0.049	1.14196
TTX	0.055	0.833144
TTX	0.0467	1.06935
TTX	0.045	0.735975
TTX	0.1799	1.2716
TTX	0.343	1.11376
pinsel	0.121	1.21038
pinsel	0.219	1.48551
pinsel	0.0578	1.17016
pinsel	0.0394	1.29022
pinsel	0.047	1.47097
pinsel	0.0577	2.06705
pinsel	0.109	2.00722
pinsel	0.0722	2.30893
pinsel	0.054	1.97524
pinsel	0.2802	1.45279
pinsel	0.252	1.18025
pinsel	0.1321	1.33566
pinsel	0.3071	1.73071
pinsel	0.1688	1.62891
pinsel	0.1292	1.53907
pinsel ctrl	0.0504	1.12747
pinsel ctrl	0.0895	0.926496
pinsel ctrl	0.0681	1.45116
pinsel ctrl	0.1179	1.75043
pinsel ctrl	0.0514	0.858221
pinsel ctrl	0.0367	1.48218
pinsel ctrl	0.1	1.16014
pinsel ctrl	0.0736	1.12543
pinsel ctrl	0.0871	0.988773
pinsel ctrl	0.0648	1.3356
pinsel ctrl	0.1071	0.846752
pinsel ctrl	0.0719	1.09126
pinsel ctrl	0.1072	1.24435
pinsel ctrl	0.0472	1.24378
